# Supplementary material for: Histone Recognition and Large-Scale Structural Analysis of the Human Bromodomain Family
Source: PubMed Central journal article supplement (PMC3326523; doi:10.1016/j.cell.2012.02.013), 2012-03-30
Supplement: mmc4.pdf [file mmc4.pdf]

## Supplemental Tables

**Table S3. Available Bromodomain Structures, Related to Experimental Procedures**

| Protein   | PDB Code   | Resolution [Å] | Reference                           |
|-----------|------------|----------------|-------------------------------------|
| ASH1L     | 3MQM       | 2.54           | this study                          |
| ATAD2     | 3DAI       | 1.95           | this study                          |
| BAZ2B     | 3G0L       | 2.03           | this study                          |
| BPTF      | 2F6N, 3UV2 | 1.45, 1.58     | (Li et al., 2006), this study       |
| BRD1      | 3RCW       | 2.21           | this study                          |
| BRD2(1)   | 2DVS       | 2.04           | (Umehara et al., 2010)              |
| BRD2(2)   | 2G4A       | NMR            | unpublished                         |
| BRD3(1)   | 2NXB       | 1.40           | this study                          |
| BRD3(2)   | 2OO1       | 1.70           | this study                          |
| BRD4(1)   | 2OSS       | 1.35           | this study                          |
| BRD4(2)   | 2OUO       | 1.89           | this study                          |
| BRD7      | 2I7K       | NMR            | (Sun et al., 2007)                  |
| BRD9      | 3HME       | 2.23           | this study                          |
| BRDT(1)   | 2RFJ       | 2.05           | this study                          |
| CECR2     | 3NXB       | 1.83           | this study                          |
| EP300     | 3I3J       | 2.33           | this study                          |
| CREBBP    | 3DWY       | 1.98           | this study                          |
| GCN5L2    | 3D7C       | 2.06           | this study                          |
| KIAA1240  | 3LXJ       | 2.33           | this study                          |
| MLL       | 3LQH       | 1.72           | (Wang et al., 2010)                 |
| PB1(1)    | 3IU5       | 1.63           | this study                          |
| PB1(2)    | 3HMF       | 1.63           | this study                          |
| PB1(3)    | 3K2J       | 2.20           | this study                          |
| PB1(4)    | 3TLP       | 2.13           | this study                          |
| PB1(5)    | 3G0J       | 1.78           | this study                          |
| PB1(6)    | 3IU6       | 1.79           | this study                          |
| PCAF      | 3GG3       | 2.25           | this study                          |
| PHIP(2)   | 3MB3       | 2.25           | this study                          |
| SMARCA2   | 2DAT       | NMR            | unpublished                         |
| SMARCA4   | 2GRC, 3UVD | 1.50           | (Singh et al., 2007), this study    |
| TAF1(2)   | 3AAD, 3UV4 | 3.30, 1.89     | (Akai et al., 2010), this study     |
| TAF1(1/2) | 1EQF, 3UV5 | 2.10, 2.03     | (Jacobson et al., 2000), this study |
| TAF1L(2)  | 3HMH       | 2.05           | this study                          |
| TIF1      | 3O33       | 2.00           | (Tsai et al., 2010)                 |
| TRIM28    | 2RO1       | NMR            | (Zeng et al., 2008)                 |
| TRIM33    | 3U5M       | 3.1            | (Xi et al., 2011)                   |
| WDR9(2)   | 3Q2E       | 1.74           | this study                          |

\*Only the first structure deposited into the PDB has been included in the table. NMR structures are also available for several bromodomains. However, due to space limitations they have not been included unless no crystal structure is available for the target.

**Table S4. Available Structures of BRD Peptide Complexes, Related to Experimental Procedures**

| Protein       | PDB Code | Reso. [Å] | Histone Mark | Peptide/Ligand                                                                                               | Reference                     |
|---------------|----------|-----------|--------------|--------------------------------------------------------------------------------------------------------------|-------------------------------|
| BPTF          | 2RI7     | 1.45      | H3K4         | H3(1-9) <b>K4</b> <sub>me2</sub>                                                                             | (Li et al., 2006)             |
| BPTF          | 2F6J     | 2.00      | H3K4         | H3(1-15) <b>K4</b> <sub>me3</sub>                                                                            | (Li et al., 2006)             |
| BPTF          | 2FSA     | 1.90      | H4K4         | H3(1-15) <b>K4</b> <sub>me2</sub>                                                                            | (Li et al., 2006)             |
| BPTF          | 3QZV     | 2.00      | H4K12        | H4(7-17) <b>K12</b> <sub>ac</sub>                                                                            | (Ruthenburg et al., 2011)     |
| BPTF          | 3QZS     | 1.80      | H4K16        | H4(12-21) <b>K16</b> <sub>ac</sub>                                                                           | (Ruthenburg et al., 2011)     |
| BPTF          | 3QZT     | 1.50      | H4K20        | H4(16-25) <b>K20</b> <sub>ac</sub>                                                                           | (Ruthenburg et al., 2011)     |
| BRD2(1)       | 2DVQ     | 2.04      | H4K12        | SGRGKGGKGLG <b>K</b> <sub>ac</sub> GGA                                                                       | (Umehara et al., 2010)        |
| BRD2(1)       | 2DVR     | 2.30      | H4K12        | GGKGLG <b>K</b> <sub>ac</sub> GGA                                                                            | (Umehara et al., 2010)        |
| BRD2(2)       | 2E3K     | 2.30      | H4K5/K12     | SGRG <b>K</b> <sub>ac</sub> GGKGLG <b>K</b> <sub>ac</sub> GGA                                                | unpublished                   |
| BRD4(1)       | 3MUK     | 1.75      | H3K23prop    | AT <b>K</b> <sub>prop</sub> AARK                                                                             | (Vollmuth and Geyer, 2010)    |
| BRD4(1)       | 3MUL     | 1.65      | H3K14buty    | G <b>K</b> <sub>but</sub>                                                                                    | (Vollmuth and Geyer, 2010)    |
| BRD4(1)       | 3UVW     | 1.49      | H4K5K8       | SGRG <b>K</b> <sub>ac</sub> GG <b>K</b> <sub>ac</sub> GLGY                                                   | this study                    |
| BRD4(1)       | 3UVX     | 1.91      | H4K12K16     | G <b>K</b> <sub>ac</sub> GGAK <b>K</b> <sub>ac</sub> RHRKV                                                   | this study                    |
| BRD4(1)       | 3UVY     | 2.02      | H4K16K20     | A <b>K</b> <sub>ac</sub> RHR <b>K</b> <sub>ac</sub> VLRDN                                                    | this study                    |
| BRD4(1)       | 3UW9     | 2.37      | H4K8K12      | G <b>K</b> <sub>ac</sub> GLG <b>K</b> <sub>ac</sub> GGAKR                                                    | this study                    |
| CREBBP        | 1JSP     | NMR       | p53K382      | SHLKS <b>K</b> GGQSTSRH <b>K</b> <sub>ac</sub> LMFK                                                          | (Mujtaba et al., 2004)        |
| MLL           | 3LQI     | 1.92      | H3K4         | H3(1-9) <b>K4</b> <sub>me2</sub>                                                                             | (Wang et al., 2010)           |
| MLL           | 3LQJ     | 1.90      | H3K4         | H3(1-9) <b>K4</b> <sub>me3</sub>                                                                             | (Wang et al., 2010)           |
| PB1(2)        | 2KTB     | NMR       | H3K14        | ARTKQTARKSTGG <b>K</b> <sub>ac</sub> APRKQL                                                                  | (Charlop-Powers et al., 2010) |
| PCAF          | 2RNW     | NMR       | H3K9         | ARTKQTARK <b>K</b> <sub>ac</sub> STGGKA                                                                      | (Zeng et al., 2008)           |
| PCAF          | 2RNX     | NMR       | H3K36        | STGGV <b>K</b> <sub>ac</sub> KPHRYKC                                                                         | (Zeng et al., 2008)           |
| PCAF          | 2RNY     | NMR       | H4K20        | GGAKRHR <b>K</b> <sub>ac</sub> VLRDNIQ                                                                       | (Zeng et al., 2008)           |
| PCAF          | 1JM4     | NMR       | HIV/Tat      | SYGR <b>K</b> <sub>ac</sub> KRRQR                                                                            | (Mujtaba et al., 2002)        |
| TIF1 $\alpha$ | 3O34     | 1.90      | H3K23        | H3(13-32) <b>K23</b> <sub>ac</sub>                                                                           | (Tsai et al., 2010)           |
| TIF1 $\alpha$ | 3O35     | 1.76      | H3K27        | H3(23-31) <b>K27</b> <sub>ac</sub>                                                                           | (Tsai et al., 2010)           |
| TIF1 $\alpha$ | 3O36     | 1.70      | H4K16        | H4(14-19) <b>K16</b> <sub>ac</sub>                                                                           | (Tsai et al., 2010)           |
| TIF1 $\alpha$ | 3O37     | 2.00      | H3K4         | H3(1-10) <b>K4</b> <sub>ac</sub>                                                                             | (Tsai et al., 2010)           |
| TRIM33        | 3U5N     | 1.95      | H3K14        | H3(1-20) <b>K9</b> <sub>me3</sub> <b>K14</b> <sub>ac</sub>                                                   | (Xi et al., 2011)             |
| TRIM33        | 3U5O     | 2.70      | H3K14K18     | H3(1-22) <b>K9</b> <sub>me3</sub> <b>K14</b> <sub>ac</sub> <b>K18</b> <sub>ac</sub>                          | (Xi et al., 2011)             |
| TRIM33        | 3U5P     | 2.80      | H3K14K18K23  | H3(1-28) <b>K9</b> <sub>me3</sub> <b>K14</b> <sub>ac</sub> <b>K18</b> <sub>ac</sub> <b>K23</b> <sub>ac</sub> | (Xi et al., 2011)             |

**Table S6. BRD Histone Interactions, Related to Results**

Acetyl-lysine specific histone interactions identified in the array of peptides with singly acetylated lysine residues. Strong specific spots are shown in bold and weak intensity spots are shown in smaller font size. Interactions confirmed by ITC are underlined, published quantified interactions are marked by “a” and published but not quantified ones are marked by “b”. Single acetylation marks identified in the H3 microSPOT array are marked by “c”.

| BRD     | Histone                                            |                                                          |                                                                  |                                                                                                                                        |                                                                                       |
|---------|----------------------------------------------------|----------------------------------------------------------|------------------------------------------------------------------|----------------------------------------------------------------------------------------------------------------------------------------|---------------------------------------------------------------------------------------|
|         | H1-4                                               | H2A                                                      | H2B                                                              | H3                                                                                                                                     | H4                                                                                    |
| ASH1L   | <b>K74</b>                                         | <b>K36</b>                                               | K30, K34, K33, K36, <b>K85</b> , K120                            | K37, <b>K56</b> , K79, K122                                                                                                            | <b>K59, K79</b>                                                                       |
| ATAD2   | K74                                                | <b>K36</b>                                               | <b>K85</b>                                                       | K56                                                                                                                                    |                                                                                       |
| BAZ2B   | K89, K98                                           | K36, K74, K129                                           | K5, K11, K12, K34, K85, K108, K116                               | <u><b>K14</b></u> , K36, K37, K79, K115, K122                                                                                          | K31, K77, K79                                                                         |
| BPTF    | K25, K31, K33, K62, K80, K84, K105, K185,          |                                                          | K11, K12, K30, K34, K43                                          | K18, K23, K27                                                                                                                          | <u>K5</u> , K8, K20,                                                                  |
| BRD2(1) | <b>K74</b> , K80, K84, K89                         | K95                                                      | K5, K34                                                          | K37, K56, K115                                                                                                                         | <u>K5</u> <sup>b</sup> , K44, K79                                                     |
| BRD3(1) |                                                    | K127                                                     | K43, K120                                                        | K122, K27 <sup>c</sup> , K64 <sup>c</sup>                                                                                              | K79                                                                                   |
| BRD3(2) |                                                    | <b>K36</b>                                               | K85                                                              |                                                                                                                                        |                                                                                       |
| BRD4(1) | K31, K33, K62, K63, K121 <sup>c</sup>              | K74, <b>K75</b> , K99,                                   | K24, K116, K120, K125,                                           | K4, K5, K18, K23, K27, <b>K36</b> , K37                                                                                                | K5, K20                                                                               |
| BRD4(2) | K84, K194                                          | <b>K5</b> , K9, K15, <b>K36</b> , K74, K75               | <b>K43</b> , K46,                                                | <u>K14</u> , <u><b>K18</b></u> , <u><b>K36</b></u> , <u><b>K37</b></u> , <u><b>K56</b></u> , K64, K115, K122                           | <u><b>K5</b></u> <sup>a</sup> , <u><b>K20</b></u> , <u><b>K44</b></u> , K77, K79, K91 |
| BRDT(1) | K33, K74, K80, K84, K89                            | K15, <b>K36</b> , K74, <b>K75</b> , K95, K99, K125, K129 | K12, K30, K34, K116                                              | K4, K9, K18, K23, K27, K36, K37, K56, K115, K122                                                                                       | K5, K8, K20, K37, K44, K91                                                            |
| BRD9    |                                                    |                                                          |                                                                  | K18 <sup>c</sup> , K14 <sup>c</sup> , K27 <sup>c</sup> , K36 <sup>c</sup> , K56 <sup>c</sup> , K115 <sup>c</sup>                       |                                                                                       |
| BRPF1   | K74                                                | <b>K15</b>                                               |                                                                  | <b>K56</b> , K115, K122                                                                                                                | <b>K44, K77, K79, K91</b>                                                             |
| CECR2   |                                                    | <b>K15, K36, K75</b>                                     |                                                                  | K9 <sup>c</sup> , K14 <sup>c</sup> , <b>K18</b> , K27 <sup>c</sup> , K36, K56, K64 <sup>c</sup> , K79 <sup>c</sup> , K115 <sup>c</sup> |                                                                                       |
| CREBBP  | K74                                                | <b>K15</b>                                               |                                                                  | K34, K43, <u><b>K36</b></u> <sup>a</sup> , <u><b>K37</b></u> , <u><b>K56</b></u> , K64, K122                                           | <u><b>K44</b></u> , K59, K77, K79, K91                                                |
| EP300   | K31, K33, K51, K63, <b>K74</b> , K116              | <b>K5, K15, K36</b> , K74, K75,                          | K23, K34, <b>K43</b> , <b>K46</b> , K108, K116, K116, K120, K125 | K4, K14, K18, K23, <u><b>K36</b></u> , K37, <u><b>K56</b></u> , K64, <b>K79, K115</b> , <b>K122</b> ,                                  | <b>K5, K8, K12, K44</b> , K77, K79, K91                                               |
| GCN5L2  | K31, K33, K138, K139, K174, K175, K189, K191, K194 | K5, K9, K125, K127, K129                                 |                                                                  | K4, K9, K36, K37, K56 <sup>c</sup>                                                                                                     | K20                                                                                   |

|          |                                                                                                                 |                                          |                                           |                                                                                                        |                                                |
|----------|-----------------------------------------------------------------------------------------------------------------|------------------------------------------|-------------------------------------------|--------------------------------------------------------------------------------------------------------|------------------------------------------------|
|          | K196, K199, K211, K212, K216, K218                                                                              |                                          |                                           |                                                                                                        |                                                |
| KIAA1240 | <b>K74</b>                                                                                                      | K5, K15, <b>K36</b>                      | <b>K43</b> , K46,                         | K9, <b>K56</b> , K115, K122                                                                            | <b>K5</b> , <b>K59</b> , K77, K79              |
| LOC93349 | K22, K128, K135, K136, K138, K139, K158, K159, K170, K173, K174, K176, K182, K185, K211, K212, K216, K217, K218 | K119, K125, K127, K129                   | K27, K30, K34                             |                                                                                                        | <b>K5</b> , <b>K8</b> , K12, K16, K20          |
| MLL      |                                                                                                                 | K15                                      |                                           |                                                                                                        |                                                |
| PB1(1)   | K33, K80, K84, K89                                                                                              | K15                                      |                                           | K56, K64, K122                                                                                         | K44, K91                                       |
| PB1(2)   |                                                                                                                 | K36                                      | K85                                       | K14 <sup>a</sup>                                                                                       |                                                |
| PB1(3)   | K62, K74, K80, K84                                                                                              | K15                                      | K23,                                      | K18 <sup>a</sup> , K36 <sup>a</sup> , K56, K64 <sup>c</sup>                                            |                                                |
| PB1(4)   |                                                                                                                 |                                          |                                           | K37 <sup>a,c</sup> , K122 <sup>c</sup>                                                                 |                                                |
| PB1(5)   |                                                                                                                 |                                          | <b>K85</b>                                |                                                                                                        |                                                |
| PB1(6)   | K84                                                                                                             |                                          | K43                                       | K56, K115 <sup>c</sup>                                                                                 |                                                |
| PCAF     | K25, K31, K33, K105, K108, K109, K151, K152, K155, K156, K158, K159                                             | K99, K116, K119, K125, K127              |                                           |                                                                                                        | K12, <u>K16</u> , <u>K20<sup>a</sup></u> , K59 |
| PHIP(2)  | K31, K33, <b>K62</b> , K80, <b>K84</b> , K89                                                                    |                                          |                                           | K9, K18, K36, K37                                                                                      | <b>K91</b>                                     |
| SMARCA2  | K33, K74, K170, K182                                                                                            | K15, K95, K107                           | <b>K5</b> , <b>K34</b>                    | <b>K14<sup>b</sup></b> , K18, K23, K27 <sup>c</sup> , K36, <b>K37</b> , K56                            | K5, K8 <sup>b</sup> ,                          |
| SMARCA4  | K80, <b>K84</b> , K105                                                                                          | K75,                                     | K20, K23, K24                             | K18, K23, K27, K36                                                                                     |                                                |
| SP140    |                                                                                                                 |                                          |                                           | K14 <sup>c</sup> , K23 <sup>c</sup> , K36 <sup>c</sup>                                                 |                                                |
| TAF1(1)  | K74                                                                                                             | K15, <b>K36</b>                          |                                           | K56                                                                                                    |                                                |
| TAF1L(1) |                                                                                                                 | K15, K36                                 | K85                                       |                                                                                                        |                                                |
| TAF1(2)  | K31, K62, K105                                                                                                  | <b>K15</b> , K75                         | K116, K120                                | K18, <b>K56</b> , K115, K64 <sup>c</sup>                                                               | <b>K44</b> , <b>K77</b> , K79                  |
| TAF1L(2) | <b>K31</b> , K33, K84, K105, K118, K147, K148                                                                   | K74, K75                                 | K11, K12, K20, K23, K24, K116, K120, K125 | K4, K9, K14, K23, K27,                                                                                 | K5, K8, <b>K77</b> , K79, <b>K91</b>           |
| TIF1     | K31, K33, K62, K63, K84, K116, K147, K148, K182                                                                 | <b>K15</b> , <b>K36</b> , K74, K75, K99, | K12, K20                                  | K4, K9 <sup>a</sup> , K14 <sup>a</sup> , K18, K23 <sup>a</sup> , K27, K36, K37, <b>K56</b> , K64, K115 | K5, <b>K44</b> , K31, K77, K79, <b>K91</b>     |
| TRIM28   |                                                                                                                 |                                          |                                           | K37 <sup>c</sup>                                                                                       |                                                |

**Table S7. ITC Data of Monoacetylated Histone Peptides, Related to Results**

| Protein | Histone Mark                | Histone Peptide Sequence      | [Protein] ( $\mu\text{M}$ ) | [Peptide] (mM)   | N                | $K_D$ ( $\mu\text{M}$ ) | $\Delta H$ (kcal/mol) | $T\Delta S$ (kcal/mol) | $\Delta G$ (kcal/mol) |
|---------|-----------------------------|-------------------------------|-----------------------------|------------------|------------------|-------------------------|-----------------------|------------------------|-----------------------|
| ATAD2   | H3K9                        | KQTARK <sub>ac</sub> STGGKY   | 55                          | 1.58             | NB               |                         |                       |                        |                       |
| BAZ2B   | H3K14                       | KSTGGK <sub>ac</sub> APRKQY   | 50                          | 1.55             | 1.00 $\pm$ 0.007 | 7.6 $\pm$ 0.3           | -8.91                 | -2.27                  | -6.64                 |
| BRD2(1) | H4K5                        | SGRGK <sub>ac</sub> GGKGLY    | 53                          | 1.52             | 1.01 $\pm$ 0.056 | 130.2 $\pm$ 4.4         | -9.78                 | -4.75                  | -5.03                 |
| BRD3(1) | H4K8                        | RGKGGK <sub>ac</sub> GLGKGY   | 56                          | 1.54             | 1.00 $\pm$ 0.000 | 211.0 $\pm$ 5.2         | -3.07                 | 1.69                   | -4.76                 |
| BRD3(2) | H3K18                       | GKAPRK <sub>ac</sub> QLATKY   | 51                          | 1.55             | 1.06 $\pm$ 0.068 | 67.1 $\pm$ 4.5          | -4.15                 | 1.26                   | -5.41                 |
|         | H4K12                       | GKGLGK <sub>ac</sub> GGAKRY   | 57                          | 1.50             | 1.00 $\pm$ 0.096 | 149.5 $\pm$ 8.0         | -4.80                 | 0.15                   | -4.96                 |
|         | H4K20                       | AKRHRK <sub>ac</sub> VLRDNY   | 58                          | 1.47             | 1.00 $\pm$ 0.005 | 10.5 $\pm$ 0.2          | -4.70                 | 1.75                   | -6.45                 |
| BRD4(1) | H3K9                        | KQTARK <sub>ac</sub> STGGKY   | 55                          | 1.48             | 1.01 $\pm$ 0.467 | 301.2 $\pm$ 40.9        | -1.22                 | 3.34                   | -4.56                 |
|         | H4K8                        | RGKGGK <sub>ac</sub> GLGKGY   | 60                          | 1.58             | 1.03 $\pm$ 0.106 | 84.7 $\pm$ 8.2          | -2.00                 | 3.25                   | -5.26                 |
| BRD4(2) | H3K14                       | KSTGGK <sub>ac</sub> APRKQY   | 54                          | 1.48             | 1.03 $\pm$ 0.383 | 260.4 $\pm$ 32.2        | -6.80                 | -2.15                  | -4.64                 |
|         | H4K5                        | SGRGK <sub>ac</sub> GGKGLY    | 51                          | 1.58             | 1.00 $\pm$ 0.000 | 60.2 $\pm$ 2.5          | -4.66                 | 0.80                   | -5.46                 |
|         | H4K31                       | IQGITK <sub>ac</sub> PAIRRY   | 55                          | 1.57             | 1.01 $\pm$ 0.122 | 170.4 $\pm$ 10.1        | -2.69                 | 2.19                   | -4.88                 |
| BRDT(1) | H4K12                       | GKGLGK <sub>ac</sub> GGAKRY   | 57                          | 1.58             | 0.96 $\pm$ 0.180 | 149.9 $\pm$ 14.6        | -4.70                 | 0.26                   | -4.95                 |
| CECR2   | H3K9                        | KQTARK <sub>ac</sub> STGGKY   | 59                          | 1.51             | 1.00 $\pm$ 0.011 | 189 $\pm$ 11.6          | -6.11                 | -1.29                  | -4.82                 |
|         | H3K14                       | KSTGGK <sub>ac</sub> APRKQY   | 56                          | 1.50             | 1.00 $\pm$ 0.005 | 43.9 $\pm$ 0.8          | -7.60                 | -1.95                  | -5.65                 |
| CREBBP  | H2AK36                      | LLRK <sub>ac</sub> GNYSERVGA  | 52                          | 1.90             | NB               |                         |                       |                        |                       |
|         | H2BK85                      | AHYNK <sub>ac</sub> RSTITSRE  | 53                          | 1.90             | 0.98 $\pm$ 0.059 | 66.2 $\pm$ 3.8          | -3.38                 | 2.03                   | -5.41                 |
|         | H3K14                       | KSTGGK <sub>ac</sub> APRKQY   | 56                          | 1.70             | 1.03 $\pm$ 0.085 | 733.7 $\pm$ 90.6        | -6.05                 | -1.99                  | -4.06                 |
|         | H3K27                       | TKAARK <sub>ac</sub> SAPATY   | 58                          | 1.59             | NB               |                         |                       |                        |                       |
|         | H3K36                       | ATGGVK <sub>ac</sub> KPHRY    | 55                          | 1.50             | 1.00 $\pm$ 0.000 | 71.4 $\pm$ 1.0          | -5.57                 | -0.20                  | -5.37                 |
|         | H3K37                       | ATGGVKK <sub>ac</sub> PHRYRPG | 53                          | 1.30             | NB               |                         |                       |                        |                       |
|         | H3K56                       | GTVALREIRRYQK <sub>ac</sub> S | 52                          | 2.00             | 0.96 $\pm$ 0.025 | 21.3 $\pm$ 1.4          | -12.02                | -5.97                  | -6.30                 |
|         | H3K56                       | IRRYQK <sub>ac</sub> STELLY   | 51                          | 0.80             | 0.97 $\pm$ 0.013 | 13.8 $\pm$ 0.4          | -7.91                 | -1.61                  | -5.80                 |
|         | H4K12                       | GKGLGK <sub>ac</sub> GGAKRY   | 59                          | 1.51             | 1.00 $\pm$ 0.026 | 48.1 $\pm$ 1.9          | -7.21                 | -1.61                  | -5.60                 |
|         | H4K20                       | AKRHRK <sub>ac</sub> VLRDNY   | 52                          | 1.50             | 1.14 $\pm$ 0.027 | 41.5 $\pm$ 1.8          | -2.74                 | 2.94                   | -5.69                 |
|         | H4K44                       | GGVK <sub>ac</sub> RISGLI     | 50                          | 1.60             | 1.06 $\pm$ 0.010 | 82.0 $\pm$ 3.8          | -3.36                 | 1.94                   | -5.29                 |
| H4K44   | RRGGVK <sub>ac</sub> RISGLY | 59                            | 1.50                        | 1.00 $\pm$ 0.099 | 25.3 $\pm$ 0.6   | -4.20                   | 1.76                  | -5.96                  |                       |

|           |        |                               |    |      |      |   |       |       |   |      |        |       |       |
|-----------|--------|-------------------------------|----|------|------|---|-------|-------|---|------|--------|-------|-------|
| EP300     | H3K27  | TKAARK <sub>ac</sub> SAPATY   | 57 | 1.47 | NB   |   |       |       |   |      |        |       |       |
|           | H3K36  | ATGGVK <sub>ac</sub> KPHRY    | 59 | 1.51 | 1.00 | ± | 0.044 | 109.4 | ± | 3.8  | -5.66  | -0.53 | -5.13 |
|           | H3K56  | GTVALREIRRYQK <sub>ac</sub> S | 55 | 1.80 | 0.98 | ± | 0.009 | 13.4  | ± | 0.5  | -12.22 | -5.91 | -6.31 |
|           | H4K12  | GKGLGK <sub>ac</sub> GGAKRY   | 52 | 1.51 | 0.99 | ± | 0.020 | 59.5  | ± | 1.4  | -8.06  | -2.58 | -5.48 |
|           | H4K20  | AKRHRK <sub>ac</sub> VLRDNY   | 52 | 1.55 | 0.98 | ± | 0.001 | 54.6  | ± | 1.3  | -4.50  | 1.03  | -5.52 |
|           | H4K44  | GGVK <sub>ac</sub> RISGLI     | 55 | 2.20 | 0.97 | ± | 0.088 | 131.9 | ± | 6.3  | -3.63  | 1.40  | -5.03 |
| FALZA     | H4K5   | SGRGK <sub>ac</sub> GGKGLY    | 53 | 1.6  | 1.00 | ± | 0.170 | 175.4 | ± | 13.3 | -3.64  | 1.23  | -4.86 |
|           | poly-R | RRRRRK <sub>ac</sub> RRRRRY   | 57 | 1.51 | 1.00 | ± | 0.000 | 3.1   | ± | 0.1  | -10.09 | -2.97 | -7.12 |
| GCN5L2    | H4K8   | SGRGK <sub>ac</sub> GGKGLY    | 51 | 1.58 | NB   |   |       |       |   |      |        |       |       |
| KIAA1240  | H4K5   | RGKGGK <sub>ac</sub> GLGKGY   | 58 | 1.58 | 1.00 | ± | 0.000 | 149.7 | ± | 6.4  | -2.31  | 2.64  | -4.95 |
| LOC93349  | H3K9   | KQTARK <sub>ac</sub> STGGKY   | 53 | 1.48 | NB   |   |       |       |   |      |        |       |       |
| PB1(1)    | H3K14  | KSTGGK <sub>ac</sub> APRKQY   | 54 | 1.54 | NB   |   |       |       |   |      |        |       |       |
|           | H4K20  | AKRHRK <sub>ac</sub> VLRDNY   | 54 | 1.47 | NB   |   |       |       |   |      |        |       |       |
| PB1(5)    | H4K16  | GKGGAK <sub>ac</sub> RHRKVY   | 53 | 1.5  | NB   |   |       |       |   |      |        |       |       |
| PCAF      | H3K14  | KSTGGK <sub>ac</sub> APRKQY   | 58 | 1.51 | 1.01 | ± | 0.162 | 188.3 | ± | 14.6 | -3.26  | 1.56  | -4.83 |
|           | H4K16  | GKGGAK <sub>ac</sub> RHRKVY   | 49 | 1.54 | 1.03 | ± | 0.180 | 102.6 | ± | 11.2 | -1.69  | 3.48  | -5.17 |
|           | H4K20  | AKRHRK <sub>ac</sub> VLRDNY   | 55 | 1.47 | 0.97 | ± | 0.140 | 90.9  | ± | 9.6  | -1.22  | 4.02  | -5.23 |
| SMARCA2   | H3K14  | KSTGGK <sub>ac</sub> APRKQY   | 52 | 1.6  | 1.05 | ± | 0.437 | 286.5 | ± | 35.2 | -2.96  | 1.63  | -4.59 |
|           | H4K16  | GKGGAK <sub>ac</sub> RHRKVY   | 53 | 1.6  | 1.00 | ± | 0.001 | 86.2  | ± | 3.0  | -1.77  | 3.48  | -5.25 |
| TIF1      | H4K16  | GKGGAK <sub>ac</sub> RHRKVY   | 59 | 1.59 | 1.00 | ± | 0.023 | 92.6  | ± | 1.9  | -8.18  | -2.94 | -5.24 |
| TAF1(1)   | H3K9   | KQTARK <sub>ac</sub> STGGKY   | 51 | 1.5  | NB   |   |       |       |   |      |        |       |       |
|           | H3K14  | KSTGGK <sub>ac</sub> APRKQY   | 50 | 1.64 | NB   |   |       |       |   |      |        |       |       |
| TAF1(2)   | H3K9   | KQTARK <sub>ac</sub> STGGKY   | 52 | 1.5  | NB   |   |       |       |   |      |        |       |       |
|           | H3K14  | KSTGGK <sub>ac</sub> APRKQY   | 54 | 1.52 | 1.03 | ± | 0.231 | 305.8 | ± | 21.4 | -0.95  | 3.59  | -4.55 |
| TAF1(1/2) | H3K9   | KQTARK <sub>ac</sub> STGGKY   | 47 | 1.5  | NB   |   |       |       |   |      |        |       |       |
|           | H3K14  | KSTGGK <sub>ac</sub> APRKQY   | 50 | 1.5  | 1.01 | ± | 0.083 | 178.9 | ± | 6.4  | -0.79  | 4.08  | -4.86 |

**Table S8. ITC Data of Polyacetylated Histone Peptides, Related to Results**

| Protein | Acetylated Histone Marks | Histone Peptide Sequence                                                          | Protein ( $\mu\text{M}$ ) | Pep. (mM) | $N^{\&}$     | $K_D$ ( $\mu\text{M}$ ) | $\Delta H$ (kcal/mol) | $T\Delta S$ (kcal/mol) | $\Delta G$ (kcal/mol) |
|---------|--------------------------|-----------------------------------------------------------------------------------|---------------------------|-----------|--------------|-------------------------|-----------------------|------------------------|-----------------------|
| BRD2(1) | H4K5/K8                  | SGRGK <sub>ac</sub> GGK <sub>ac</sub> GLGY                                        | 55.70                     | 1.84      | 0.99 ± 0.006 | 13.5 ± 0.3              | -16.44                | -10.13                 | -6.31                 |
|         | H4K8/12                  | GK <sub>ac</sub> GLGK <sub>ac</sub> GGAKR                                         | 53.00                     | 1.50      | 1.00 ± 0.050 | 65.8 ± 3.5              | -4.60                 | 0.82                   | -5.42                 |
|         | H4K12/16                 | GK <sub>ac</sub> GGAK <sub>ac</sub> RHRKV                                         | 47.60                     | 2.29      | 1.00 ± 0.019 | 29.4 ± 1.0              | -5.77                 | 0.10                   | -5.87                 |
|         | H4K12/16/20              | GK <sub>ac</sub> GGAK <sub>ac</sub> RHRK <sub>ac</sub> V                          | 47.00                     | 1.26      | 0.50 ± 0.009 | 27.9 ± 0.7              | -18.81                | -12.90                 | -5.91                 |
|         | H4K5/8/12/16             | YSGRGK <sub>ac</sub> GGK <sub>ac</sub> GLGK <sub>ac</sub> GGAK <sub>ac</sub> RHRK | 50.00                     | 1.45      | 0.53 ± 0.003 | 3.7 ± 0.1               | -30.55                | -23.52                 | -7.03                 |
| BRD2(2) | H4K5/K8                  | SGRGK <sub>ac</sub> GGK <sub>ac</sub> GLGY                                        | 55.00                     | 1.38      | 0.96 ± 0.015 | 32.8 ± 1.6              | -3.57                 | 2.24                   | -5.81                 |
|         | H4K8/12                  | GK <sub>ac</sub> GLGK <sub>ac</sub> GGAKR                                         | 49.70                     | 1.50      | 0.51 ± 0.023 | 55.9 ± 1.5              | -12.51                | -6.99                  | -5.52                 |
|         | H4K12/16                 | GK <sub>ac</sub> GGAK <sub>ac</sub> RHRKV                                         | 50.70                     | 1.50      | 1.00 ± 0.017 | 27.2 ± 1.0              | -3.51                 | 2.40                   | -5.91                 |
|         | H4K12/16/20              | GK <sub>ac</sub> GGAK <sub>ac</sub> RHRK <sub>ac</sub> V                          | 51.73                     | 1.26      | 0.50 ± 0.024 | 41.0 ± 1.5              | -11.05                | -5.38                  | -5.67                 |
|         | H4K5/8/12/16             | YSGRGK <sub>ac</sub> GGK <sub>ac</sub> GLGK <sub>ac</sub> GGAK <sub>ac</sub> RHRK | 50.70                     | 1.60      | 0.50 ± 0.033 | 34.7 ± 2.0              | -7.02                 | -1.24                  | -5.78                 |
| BRD3(1) | H4K12/16/20              | GK <sub>ac</sub> GGAK <sub>ac</sub> RHRK <sub>ac</sub> V                          | 54.00                     | 1.50      | 0.51 ± 0.014 | 31.4 ± 0.9              | -19.09                | -13.24                 | -5.85                 |
| BRD3(2) | H4K12/16/20              | GK <sub>ac</sub> GGAK <sub>ac</sub> RHRK <sub>ac</sub> V                          | 51.43                     | 1.50      | 0.50 ± 0.027 | 61.3 ± 1.9              | -12.42                | -6.96                  | -5.46                 |
| BRD4(1) | H4K5/K8                  | SGRGK <sub>ac</sub> GGK <sub>ac</sub> GLGY                                        | 56.35                     | 1.94      | 1.00 ± 0.003 | 6.8 ± 0.1               | -15.75                | -9.06                  | -6.69                 |
|         | H4K8/12                  | GK <sub>ac</sub> GLGK <sub>ac</sub> GGAKR                                         | 58.00                     | 1.50      | 0.50 ± 0.012 | 27.4 ± 0.9              | -10.33                | -4.41                  | -5.92                 |
|         | H4K12/16                 | GK <sub>ac</sub> GGAK <sub>ac</sub> RHRKV                                         | 57.70                     | 2.35      | 1.02 ± 0.013 | 46.1 ± 0.9              | -7.73                 | -2.11                  | -5.62                 |
|         | H4K12/16/20              | GK <sub>ac</sub> GGAK <sub>ac</sub> RHRK <sub>ac</sub> V                          | 56.00                     | 1.26      | 0.50 ± 0.012 | 20.4 ± 0.8              | -15.94                | -9.85                  | -6.09                 |
|         | H4K5/8/12/16             | YSGRGK <sub>ac</sub> GGK <sub>ac</sub> GLGK <sub>ac</sub> GGAK <sub>ac</sub> RHRK | 54.00                     | 1.50      | 0.57 ± 0.005 | 2.8 ± 0.2               | -28.59                | -21.39                 | -7.20                 |
| BRD4(2) | H4K5/K8                  | SGRGK <sub>ac</sub> GGK <sub>ac</sub> GLGY                                        | 58.00                     | 1.75      | 0.50 ± 0.031 | 63.3 ± 2.3              | -11.64                | -6.20                  | -5.44                 |
|         | H4K8/12                  | GK <sub>ac</sub> GLGK <sub>ac</sub> GGAKR                                         | 50.00                     | 1.50      | 0.50 ± 0.013 | 20.4 ± 0.8              | -13.59                | -7.50                  | -6.09                 |
|         | H4K12/16                 | GK <sub>ac</sub> GGAK <sub>ac</sub> RHRKV                                         | 50.76                     | 2.27      | 1.01 ± 0.018 | 49.3 ± 1.1              | -7.25                 | -1.66                  | -5.58                 |
|         | H4K12/16/20              | GK <sub>ac</sub> GGAK <sub>ac</sub> RHRK <sub>ac</sub> V                          | 54.00                     | 1.50      | 0.50 ± 0.012 | 22.7 ± 0.8              | -12.71                | -6.68                  | -6.03                 |

|                    |              |                                                                                   |       |      |      |         |       |        |        |        |       |
|--------------------|--------------|-----------------------------------------------------------------------------------|-------|------|------|---------|-------|--------|--------|--------|-------|
|                    | H4K5/8/12/16 | YSGRGK <sub>ac</sub> GGK <sub>ac</sub> GLGK <sub>ac</sub> GGAK <sub>ac</sub> RHRK | 51.30 | 1.60 | 0.25 | ± 0.018 | 26.6  | ± 1.1  | -23.02 | -17.06 | -5.96 |
| BRD4(1/2)          | H4K5/8/12/16 | YSGRGK <sub>ac</sub> GGK <sub>ac</sub> GLGK <sub>ac</sub> GGAK <sub>ac</sub> RHRK | 52.00 | 1.60 | 0.70 | ± 0.007 | 2.7   | ± 0.2  | -21.02 | -13.81 | -7.21 |
| BRDT(1)            | H4K5/8/12/16 | YSGRGK <sub>ac</sub> GGK <sub>ac</sub> GLGK <sub>ac</sub> GGAK <sub>ac</sub> RHRK | 54.00 | 1.50 | 2.04 | ± 0.078 | 23.0  | ± 0.5  | -7.70  | -1.69  | -6.01 |
| CREBBP             | H3S10K14K18  | KpSTGGK <sub>ac</sub> APRK <sub>ac</sub> QY                                       | 49.00 | 1.60 | 1.00 | ± 0.093 | 131   | ± 6.5  | -4.73  | 0.30   | -5.03 |
| TAF1(1/2)          | H3K9/K14     | KQTARK <sub>ac</sub> STGGK <sub>ac</sub> APRKQY                                   | 56.00 | 1.49 | 1.02 | ± 0.215 | 339   | ± 21   | -2.33  | 2.16   | -4.49 |
|                    | H3K9/S10/K14 | KQTARK <sub>ac</sub> pSTGGK <sub>ac</sub> APRKQY                                  | 58.00 | 1.58 | 1.05 | ± 0.099 | 150   | ± 8.7  | -0.77  | 4.16   | -4.93 |
| CECR2 <sup>‡</sup> | H3K9K14      | KQTARK <sub>ac</sub> STGGK <sub>ac</sub> APRKQY                                   | 55.00 | 1.55 | 1.00 | ± 0.000 | 57.8  | ± 1.9  | -10.70 | -4.59  | -5.49 |
|                    |              |                                                                                   |       |      |      | ± 0.000 | 164.5 | ± 5.5  | -10.07 | -5.15  | -4.90 |
|                    | H3K9/S10/K14 | KQTARK <sub>ac</sub> pSTGGK <sub>ac</sub> APRKQY                                  | 55.00 | 1.49 | 1.00 | ± 0.000 | 51.0  | ± 1.8  | -6.42  | -0.86  | -5.56 |
|                    |              |                                                                                   |       |      |      | ± 0.000 | 609.8 | ± 48.0 | -6.95  | -2.78  | -4.17 |

**N<sup>‡</sup>**: For binding stoichiometries of 0.5 or 0.25, two or more bromodomains interact with one peptide. The derived binding constants have to be therefore considered as apparent binding constants since the different binding events could not be deconvoluted.

**‡**: Deconvoluted binding constants using a sequential binding model (Klosi et al., 2007).

**Table S9. Effect of Linker Sequence to Peptide Binding on the Bromodomains of BRD4 Determined by ITC, Related to Results**

| Protein                                           | Peptide                            | Histone Peptide Sequence                                  | Protein ( $\mu\text{M}$ ) | Pep. (mM) | $N^{\&}$                                     | $K_D$ ( $\mu\text{M}$ )                      | $\Delta H$ (kcal/mol) | $T\Delta S$ (kcal/mol) | $\Delta G$ (kcal/mol) |
|---------------------------------------------------|------------------------------------|-----------------------------------------------------------|---------------------------|-----------|----------------------------------------------|----------------------------------------------|-----------------------|------------------------|-----------------------|
| <b>BRD4(1)</b>                                    | <b>Linker = 3 Gly</b> <sup>#</sup> | Biotin-SGRGK <sub>ac</sub> GGGK <sub>ac</sub> GLGY        | 59.0                      | 1.49      | 1.00 $\pm$ 0.05                              | 83.3 $\pm$ 3.5                               | -8.78                 | -3.48                  | -5.30                 |
|                                                   | <b>Linker = 2 Gly</b> <sup>#</sup> | Biotin-SGRGK <sub>ac</sub> GGK <sub>ac</sub> GLGY         | 44.5                      | 2.10      | 0.98 $\pm$ 0.01                              | 7.0 $\pm$ 0.3                                | -15.62                | -8.94                  | -6.68                 |
|                                                   | <b>Linker = 1 Gly</b> <sup>#</sup> | Biotin-SGRGK <sub>ac</sub> GK <sub>ac</sub> GLGY          | 59.0                      | 1.63      | 0.99 $\pm$ 0.06                              | 108.5 $\pm$ 4.5                              | -7.73                 | -2.59                  | -5.14                 |
|                                                   | <b>Linker = 0 Gly</b> <sup>#</sup> | Biotin-SGRGK <sub>ac</sub> K <sub>ac</sub> GLGY           | 55.6                      | 1.59      | 1.02 $\pm$ 0.35                              | 285.7 $\pm$ 28.2                             | -9.46                 | -4.87                  | -4.59                 |
|                                                   | <b>H4K5</b>                        | Biotin-SGRGK <sub>ac</sub> GGKGLGY                        | 55.6                      | 1.71      | 1.06 $\pm$ 0.25                              | very weak interaction ( $\Delta H < 1$ Kcal) |                       |                        |                       |
|                                                   | <b>H4K8</b>                        | Biotin-SGRGKGGK <sub>ac</sub> GLGY                        | 55.6                      | 1.80      | very weak interaction ( $\Delta H < 1$ Kcal) |                                              |                       |                        |                       |
|                                                   | <b>H4K5/16</b>                     | Biotin-SGRGK <sub>ac</sub> GGKGLGKGGAK <sub>ac</sub> RHRY | 55.6                      | 1.61      | 1.02 $\pm$ 0.07                              | 92.6 $\pm$ 4.3                               | -6.50                 | -1.27                  | -5.23                 |
| <b><math>\Delta</math>BRD4(1)<sup>N140A</sup></b> | <b>H4K5/8</b>                      | SGRGK <sub>ac</sub> GGK <sub>ac</sub> GLGY                | 60.0                      | 2.10      | No binding                                   |                                              |                       |                        |                       |
| <b>BRD4(2)</b>                                    | <b>Linker = 3 Gly</b> <sup>#</sup> | Biotin-SGRGK <sub>ac</sub> GGGK <sub>ac</sub> GLGY        | 46.1                      | 1.49      | 1.01 $\pm$ 0.10                              | 135.3 $\pm$ 5.6                              | -8.48                 | -3.45                  | -5.03                 |
|                                                   | <b>Linker = 2 Gly</b> <sup>#</sup> | Biotin-SGRGK <sub>ac</sub> GGK <sub>ac</sub> GLGY         | 46.1                      | 2.10      | 0.54 $\pm$ 0.03                              | 36.5 $\pm$ 3.6                               | -5.92                 | -0.17                  | -5.75                 |
|                                                   | <b>Linker = 1 Gly</b> <sup>#</sup> | Biotin-SGRGK <sub>ac</sub> GK <sub>ac</sub> GLGY          | 46.1                      | 1.53      | 1.14 $\pm$ 0.04                              | 44.4 $\pm$ 1.9                               | -5.18                 | 0.46                   | -5.64                 |
|                                                   | <b>Linker = 0 Gly</b> <sup>#</sup> | Biotin-SGRGK <sub>ac</sub> K <sub>ac</sub> GLGY           | 46.1                      | 1.60      | 1.01 $\pm$ 0.07                              | 68.0 $\pm$ 3.4                               | -6.67                 | -1.27                  | -5.40                 |
|                                                   | <b>H4K5</b>                        | Biotin-SGRGK <sub>ac</sub> GGKGLGY                        | 46.1                      | 1.71      | 1.03 $\pm$ 0.15                              | 155.5 $\pm$ 8.8                              | -5.90                 | -0.97                  | -4.93                 |
|                                                   | <b>H4K8</b>                        | Biotin-SGRGKGGK <sub>ac</sub> GLGY                        | 46.1                      | 1.80      | very weak interaction ( $\Delta H < 1$ Kcal) |                                              |                       |                        |                       |
|                                                   | <b>H4K5/16</b>                     | Biotin-SGRGK <sub>ac</sub> GGKGLGKGGAK <sub>ac</sub> RHRY | 46.1                      | 1.61      | 1.00 $\pm$ 0.08                              | 59.5 $\pm$ 3.7                               | -4.08                 | 1.40                   | -5.47                 |
| <b><math>\Delta</math>BRD4(2)<sup>N433A</sup></b> | <b>H4K5/8</b>                      | SGRGK <sub>ac</sub> GGK <sub>ac</sub> GLGY                | 58.5                      | 2.10      | No binding                                   |                                              |                       |                        |                       |

<sup>#</sup> The parent sequence used to probe the effect of the linker between K<sub>ac</sub> marks is that of H4K5<sub>ac</sub>K8<sub>ac</sub> (SGRGK<sub>ac</sub>GGK<sub>ac</sub>GLG)

$N^{\&}$ : For binding stoichiometries of 0.5, two bromodomains interact with one peptide. The derived binding constants have to be therefore considered as apparent binding constants since the different binding events could not be deconvoluted.
